# Supplementary material for: Distribution of bacterial communities along the spatial and environmental gradients from Bohai Sea to northern Yellow Sea
Source: PeerJ. 2018 Jan 29;6:e4272. doi: 10.7717/peerj.4272 (PMC5793709; doi:10.7717/peerj.4272)
Supplement: Dataset S1 — (A) Environmental parameters determined for each samples. (B) Pearson’s correlations between environmental variables. Significant correlations are highlighted with bold type for probabilities (P) in lower triangle, and with gray shadow for coefficients (ρ ) in upper triangle. (C) Pearson’s correlations between environmental variables in surface water. Significant correlations are highlighted with bold type for probabilities (P) in lower triangle, and with gray shadow for coefficients (ρ ) in upper triangle. (D) Pearson’s correlations between environmental variables of bottom water. Significant correlations are highlighted with bold type for probabilities (P) in lower triangle, and with gray shadow for coefficients (ρ ) in upper triangle. [file peerj-06-4272-s002.xlsx]

## Sheet: Sheet1
	Dataset S1
	a) Environmental parameters determined for each samples.
	Samples	Longitude (E)	Latitude (N)	Water Depth (m)	Collection Depth (m)	Temperature (°C)	Salinity (psu)	pH	Turbidity (NTU)	Dissolved oxygen (mL/L)	Chl a (μg/L)	NH4-N (μg/L)	NO2-N (μg/L)	NO3-N (μg/L)	PO4-P (μg/L)	SiO3-Si (μg/L)	IN/IP
	P1s	119.307	38.0848	15	0	24.8402	30.0494	7.98375	3.18598	4.889	2.98032	20.6	11.21	95.6	1.86	96.1333	151.679
	P1b	119.307	38.0848	15	13	24.7125	30.0594	7.9691	3.85149	4.6882	1.66843	19.9	13.04	56.1	3.67	118.533	53.7221
	B8s	119.562	38.2443	20	0	23.7329	30.1941	7.90088	1.52737	5.09374	6.24811	10.6	3.78	28.05	2.91	105.933	32.286
	B8b	119.562	38.2443	20	18	21.9753	29.9905	7.74682	5.80266	3.237	0.429891	6.3	4.23	76.3	2.68	159.6	71.7412
	B6s	120.048	38.4977	25	0	23.7555	30.3928	8.0805	0.2333	4.966	3.0499	12.1	2.87	29.15	2.97	99.4	32.8937
	B6b	120.048	38.4977	25	23	21.9682	30.515	7.91046	4.51701	3.62852	0.879462	9.8	6.305	26.9	9.135	221.2	10.4242
	R5s	120.755	38.5037	36	0	25.0839	30.2748	8.166	0.0045	5.21167	0.954333	16.1	0.76	25.3	1.09	94.7333	85.6461
	R5b	120.755	38.5037	36	34	16.321	30.8233	7.85547	2.63283	4.12183	0.179481	17	12.21	61.3	8.44	146.533	23.7459
	L5s	121.109	38.2349	27	0	23.7287	30.461	8.212	-0.0057	6.213	1.1387	10.8	0.99	40.875	0.81	68.6	143.97
	L5b	121.109	38.2349	27	25	17.784	30.744	7.92113	0.830485	4.51242	0.587373	11.2	19.72	91.35	4.1	119.933	66.0343
	E4s	121.499	38.0483	32.9	0	24.8188	30.4613	8.32629	0.0611286	6.55657	6.1513	9.8	1.195	18.85	2.5	66.9667	26.4341
	E4b	121.499	38.0483	32.9	30	17.6202	30.8188	7.92302	0.783655	4.43626	0.240983	15.4	18.75	33.35	4.35	107.333	34.3596
	K5s	122.179	38.1964	51	0	25.7645	30.8576	8.16729	-0.137952	4.89514	0.033719	22.6	1.12	25.65	5.14	75.1333	21.2683
	K5b	122.179	38.1964	51	48	6.08494	31.5874	7.69478	0.246266	4.65283	0.300337	14.1	0.72	136.05	17.03	218.4	19.6165
	b) Pearson's correlations between environmental variables. Significant correlations are highlighted with bold type for probabilities (P ≤ 0.05 after Benjamini-Hochberg multiple test correction) in lower triangle, and with gray shadow for coefficients (|ρ|≥0.5) in upper triangle.
		Longitude	Latitude	Water Depth	Collection Depth	Temperature	Salinity	pH	Turbidity	Dissolved oxygen	Chl a	NH4-N	NO2-N	NO3-N	PO4-P	SiO3-Si	IN/IP
	Longitude	—	-0.12	0.91	0.31	-0.45	0.83	0.22	-0.71	0.32	-0.32	0.12	-0.17	0.04	0.41	-0.06	-0.31
	Latitude	0.68	—	0.11	0.05	-0.01	0.03	-0.07	0.05	-0.3	-0.23	-0.19	-0.25	-0.22	0.14	0.32	-0.21
	Water Depth	<0.01	0.72	—	0.34	-0.48	0.84	0.07	-0.6	0.12	-0.38	0.25	-0.33	0.08	0.56	0.11	-0.44
	Collection Depth	0.29	0.87	0.23	—	-0.91	0.68	-0.76	0.2	-0.56	-0.56	-0.08	0.4	0.6	0.81	0.77	-0.41
	Temperature	0.1	0.97	0.08	<0.01	—	-0.81	0.68	0.09	0.31	0.41	0.1	-0.19	-0.7	-0.85	-0.66	0.33
	Salinity	<0.01	0.93	<0.01	0.01	<0.01	—	-0.25	-0.49	-0.02	-0.41	0.12	-0.01	0.37	0.8	0.38	-0.47
	pH	0.46	0.82	0.82	<0.01	0.01	0.38	—	-0.54	0.8	0.37	0.14	-0.34	-0.67	-0.61	-0.79	0.23
	Turbidity	<0.01	0.87	0.02	0.49	0.75	0.08	0.04	—	-0.72	-0.14	-0.17	0.26	0.2	0.02	0.5	0.05
	Dissolved oxygen	0.27	0.29	0.67	0.04	0.28	0.96	<0.01	<0.01	—	0.56	0.07	-0.38	-0.32	-0.37	-0.71	0.28
	Chl a	0.27	0.43	0.18	0.04	0.15	0.14	0.2	0.64	0.04	—	-0.25	-0.27	-0.34	-0.36	-0.39	-0.02
	NH4-N	0.67	0.52	0.39	0.79	0.72	0.67	0.63	0.56	0.82	0.38	—	0.2	0.07	0.05	-0.26	0.09
	NO2-N	0.57	0.39	0.24	0.15	0.52	0.98	0.23	0.36	0.18	0.36	1	—	0.23	-0.04	0.06	0.04
	NO3-N	0.88	0.44	0.79	0.02	0.01	0.19	0.01	0.5	0.26	0.24	0.82	0.43	—	0.54	0.49	0.21
	PO4-P	0.15	0.63	0.04	<0.01	<0.01	<0.01	0.02	0.93	0.2	0.2	0.87	0.88	1	—	0.8	-0.55
	SiO3-Si	0.84	0.26	0.7	<0.01	0.01	0.18	<0.01	0.07	<0.01	0.16	0.37	0.85	1	<0.01	—	-0.41
	IN/IP	0.28	0.46	0.11	0.14	0.25	0.09	0.44	0.87	0.34	0.95	0.75	0.9	0.46	0.04	0.15	—
	c) Pearson's correlations between environmental variables in surface water. Significant correlations are highlighted with bold type for probabilities (P ≤ 0.05 after Benjamini-Hochberg multiple test correction) in lower triangle, and with gray shadow for coefficients (|ρ|≥0.5) in upper triangle.
		Longitude	Latitude	Water Depth	Collection Depth	Temperature	Salinity	pH	Turbidity	Dissolved oxygen	Chl a	NH4-N	NO2-N	NO3-N	PO4-P	SiO3-Si	IN/IP
	Longitude	—	-0.12	0.91	—	0.54	0.9	0.82	-0.79	0.43	-0.41	0.13	-0.74	-0.58	0.35	-0.82	-0.34
	Latitude	0.79	—	0.11	—	-0.23	-0.02	-0.12	-0.4	-0.39	-0.36	-0.11	-0.37	-0.37	-0.14	0.48	-0.15
	Water Depth	<0.01	0.82	—	—	0.69	0.88	0.59	-0.74	0.04	-0.52	0.37	-0.68	-0.6	0.53	-0.52	-0.48
	Collection Depth	—	—	—	—	—	—	—	—	—	—	—	—	—	—	—	—
	Temperature	0.21	0.62	0.08	—	—	0.42	0.34	-0.09	-0.19	-0.42	0.77	-0.03	0.02	0.42	-0.3	-0.14
	Salinity	0.01	0.96	0.01	—	0.34	—	0.57	-0.74	0.15	-0.44	0.21	-0.67	-0.57	0.63	-0.65	-0.49
	pH	0.02	0.8	0.16	—	0.46	0.18	—	-0.72	0.73	-0.22	-0.16	-0.63	-0.45	-0.09	-0.86	-0.1
	Turbidity	0.03	0.37	0.06	—	0.84	0.06	0.07	—	-0.41	0.32	0.28	0.97	0.86	-0.14	0.53	0.46
	Dissolved oxygen	0.34	0.39	0.93	—	0.69	0.75	0.06	0.36	—	0.29	-0.64	-0.44	-0.31	-0.41	-0.75	0.07
	Chl a	0.35	0.43	0.23	—	0.35	0.32	0.64	0.49	0.52	—	-0.62	0.19	-0.09	-0.02	0.22	-0.34
	NH4-N	0.77	0.82	0.41	—	0.04	0.65	0.72	0.54	0.12	0.14	—	0.38	0.45	0.42	0.06	0.17
	NO2-N	0.06	0.41	0.09	—	0.96	0.1	0.13	<0.01	0.33	0.68	0.4	—	0.92	-0.1	0.46	0.5
	NO3-N	0.17	0.41	0.16	—	0.97	0.18	0.31	0.01	0.5	0.84	0.31	<0.01	—	-0.28	0.24	0.76
	PO4-P	0.44	0.76	0.22	—	0.35	0.13	0.84	0.76	0.36	0.96	0.35	0.82	0.54	—	-0.02	-0.73
	SiO3-Si	0.02	0.28	0.23	—	0.51	0.12	0.01	0.22	0.05	0.64	0.89	0.29	0.61	0.96	—	-0.04
	IN/IP	0.46	0.75	0.28	—	0.76	0.27	0.82	0.3	0.88	0.46	0.72	0.26	0.05	0.06	0.93	—
	d) Pearson's correlations between environmental variables of bottom water. Significant correlations are highlighted with bold type for probabilities (P ≤ 0.05 after Benjamini-Hochberg multiple test correction) in lower triangle, and with gray shadow for coefficients (|ρ|≥0.5) in upper triangle.
		Longitude	Latitude	Water Depth	Collection Depth	Temperature	Salinity	pH	Turbidity	Dissolved oxygen	Chl a	NH4-N	NO2-N	NO3-N	PO4-P	SiO3-Si	IN/IP
	Longitude	—	-0.12	0.91	0.9	-0.9	0.95	-0.35	-0.91	0.5	-0.68	0.11	0.05	0.5	0.62	0.15	-0.4
	Latitude	0.79	—	0.11	0.15	0.01	0.06	-0.11	0.33	-0.51	-0.23	-0.28	-0.3	-0.17	0.29	0.54	-0.48
	Water Depth	<0.01	0.82	—	1	-0.97	0.97	-0.59	-0.72	0.35	-0.69	0.12	-0.3	0.57	0.85	0.42	-0.58
	Collection Depth	0.01	0.76	<0.01	—	-0.97	0.96	-0.58	-0.71	0.34	-0.69	0.13	-0.29	0.57	0.84	0.42	-0.59
	Temperature	0.01	0.98	<0.01	<0.01	—	-0.95	0.65	0.74	-0.41	0.63	-0.08	0.32	-0.74	-0.82	-0.4	0.42
	Salinity	<0.01	0.9	<0.01	<0.01	<0.01	—	-0.41	-0.83	0.5	-0.57	0.18	-0.15	0.55	0.82	0.37	-0.58
	pH	0.44	0.82	0.17	0.17	0.11	0.36	—	0.03	0.27	0.56	0.42	0.78	-0.71	-0.58	-0.58	0.08
	Turbidity	<0.01	0.48	0.07	0.08	0.06	0.02	0.95	—	-0.79	0.4	-0.38	-0.36	-0.43	-0.43	0.16	0.24
	Dissolved oxygen	0.25	0.24	0.44	0.46	0.37	0.25	0.55	0.04	—	0.19	0.77	0.41	0.32	0.25	-0.34	-0.1
	Chl a	0.1	0.62	0.09	0.08	0.13	0.18	0.19	0.37	0.68	—	0.33	0.08	-0.27	-0.31	-0.13	0.21
	NH4-N	0.81	0.54	0.79	0.78	0.86	0.69	0.35	0.39	0.04	0.47	—	0.36	-0.08	0.1	-0.39	-0.26
	NO2-N	0.91	0.52	0.52	0.52	0.49	0.76	0.04	0.43	0.36	0.87	0.43	—	-0.41	-0.61	-0.86	0.31
	NO3-N	0.26	0.71	0.18	0.18	0.06	0.2	0.07	0.33	0.48	0.56	0.86	0.36	—	0.54	0.28	0.16
	PO4-P	0.13	0.53	0.02	0.02	0.02	0.02	0.18	0.34	0.59	0.5	0.82	0.14	0.21	—	0.77	-0.74
	SiO3-Si	0.75	0.21	0.34	0.34	0.38	0.42	0.17	0.74	0.46	0.78	0.38	0.01	0.54	0.04	—	-0.61
	IN/IP	0.37	0.28	0.17	0.16	0.35	0.17	0.87	0.61	0.83	0.65	0.58	0.5	0.74	0.06	0.15	—
