# Supplementary material for: Distribution of bacterial communities along the spatial and environmental gradients from Bohai Sea to northern Yellow Sea
Source: PeerJ. 2018 Jan 29;6:e4272. doi: 10.7717/peerj.4272 (PMC5793709; doi:10.7717/peerj.4272)
Supplement: Dataset S2 [file peerj-06-4272-s003.xlsx]

## Sheet: Sheet1
	Dataset S2 Results from least discriminant analysis (LDA) effect size.
	Feature	Log Highest Mean	Class	Log LDA Score
	Bacteria	6			-
	Bacteria.Actinobacteria	4.95435			-
	Bacteria.Actinobacteria.Acidimicrobiia	4.93435			-
	Bacteria.Actinobacteria.Acidimicrobiia.Acidimicrobiales	4.93435			-
	Bacteria.Actinobacteria.Acidimicrobiia.Acidimicrobiales.OCS155	4.90389			-
	Bacteria.Bacteroidetes	5.34961	Cluster II	4.59389	0.0340475
	Bacteria.Bacteroidetes.Chitinophagia	4.16629			-
	Bacteria.Bacteroidetes.Chitinophagia.Chitinophagales	4.16629			-
	Bacteria.Bacteroidetes.Chitinophagia.Chitinophagales.Saprospiraceae	3.96496			-
	Bacteria.Bacteroidetes.Chitinophagia.Chitinophagales.Saprospiraceae.unknown Saprospiraceae	3.95173			-
	Bacteria.Bacteroidetes.Cytophagia	3.67554	Cluster II	3.60269	0.00963014
	Bacteria.Bacteroidetes.Cytophagia.Cytophagales	3.67554	Cluster II	3.64562	0.00963014
	Bacteria.Bacteroidetes.Cytophagia.Cytophagales.Flammeovirgaceae	3.67554	Cluster II	3.62557	0.00963014
	Bacteria.Bacteroidetes.Cytophagia.Cytophagales.Flammeovirgaceae.unknown Flammeovirgaceae	3.67311	Cluster II	3.61089	0.00669179
	Bacteria.Bacteroidetes.Flavobacteriia	5.31641	Cluster II	4.63946	0.0225311
	Bacteria.Bacteroidetes.Flavobacteriia.Flavobacteriales	5.3107	Cluster II	4.63001	0.0225311
	Bacteria.Bacteroidetes.Flavobacteriia.Flavobacteriales.Cryomorphaceae	4.92629	Cluster II	4.49376	0.0145316
	Bacteria.Bacteroidetes.Flavobacteriia.Flavobacteriales.Cryomorphaceae.Fluviicola	4.70357	Cluster II	4.31561	0.0113011
	Bacteria.Bacteroidetes.Flavobacteriia.Flavobacteriales.Cryomorphaceae.unknown Cryomorphaceae	4.52871	Cluster II	4.02706	0.0145316
	Bacteria.Bacteroidetes.Flavobacteriia.Flavobacteriales.Flavobacteriaceae	5.05531			-
	Bacteria.Bacteroidetes.Flavobacteriia.Flavobacteriales.Flavobacteriaceae.Flavobacterium	4.48674			-
	Bacteria.Bacteroidetes.Flavobacteriia.Flavobacteriales.Flavobacteriaceae.Mesonia	3.31436			-
	Bacteria.Bacteroidetes.Flavobacteriia.Flavobacteriales.Flavobacteriaceae.unknown Flavobacteriaceae	4.89099			-
	Bacteria.Bacteroidetes.Flavobacteriia.Flavobacteriales.NS9	4.08977	Cluster III	3.82499	0.00652948
	Bacteria.Bacteroidetes.Flavobacteriia.Flavobacteriales.unknown Flavobacteriales	3.82733			-
	Bacteria.Chloroflexi	3.96506	Cluster III	3.76905	0.00487879
	Bacteria.Chloroflexi.SAR202	3.96506	Cluster III	3.76629	0.00487879
	Bacteria.Cyanobacteria	5.35584	Cluster I	4.99061	0.0109671
	Bacteria.Cyanobacteria.Synechococcophycideae	5.35584	Cluster I	4.98866	0.0109671
	Bacteria.Cyanobacteria.Synechococcophycideae.Synechococcales	5.35584	Cluster I	4.99198	0.0109671
	Bacteria.Cyanobacteria.Synechococcophycideae.Synechococcales.Synechococcaceae	5.35584	Cluster I	4.98952	0.0109671
	Bacteria.Cyanobacteria.Synechococcophycideae.Synechococcales.Synechococcaceae.Synechococcus	5.35584	Cluster I	4.99342	0.0109671
	Bacteria.Firmicutes	4.56763			-
	Bacteria.Firmicutes.Bacilli	4.56763			-
	Bacteria.Firmicutes.Bacilli.Bacillales	4.36352	Cluster III	3.92572	0.036412
	Bacteria.Firmicutes.Bacilli.Bacillales.Bacillaceae	4.35353	Cluster III	3.91596	0.036412
	Bacteria.Firmicutes.Bacilli.Bacillales.Bacillaceae.unknown Bacillaceae	4.29691	Cluster III	3.8665	0.036412
	Bacteria.Firmicutes.Bacilli.Lactobacillales	4.14163			-
	Bacteria.Firmicutes.Bacilli.Lactobacillales.Streptococcaceae	4.12904			-
	Bacteria.Firmicutes.Bacilli.Lactobacillales.Streptococcaceae.Lactococcus	4.11973			-
	Bacteria.Planctomycetes	4.79086	Cluster III	4.43652	0.00699292
	Bacteria.Planctomycetes.OM190	4.10237	Cluster III	3.74272	0.0109671
	Bacteria.Planctomycetes.Planctomycetia	4.64297	Cluster III	4.30362	0.00487879
	Bacteria.Planctomycetes.Planctomycetia.Pirellulales	3.84353	Cluster III	3.47677	0.0236188
	Bacteria.Planctomycetes.Planctomycetia.Pirellulales.Pirellulaceae	3.84353	Cluster III	3.47961	0.0236188
	Bacteria.Planctomycetes.Planctomycetia.Planctomycetales	4.56793	Cluster III	4.251	0.00392092
	Bacteria.Planctomycetes.Planctomycetia.Planctomycetales.Planctomycetaceae	4.56793	Cluster III	4.25104	0.00392092
	Bacteria.Planctomycetes.Planctomycetia.Planctomycetales.Planctomycetaceae.Planctomyces	4.56793	Cluster III	4.25104	0.00392092
	Bacteria.Proteobacteria	5.7763			-
	Bacteria.Proteobacteria.Alphaproteobacteria	5.51013			-
	Bacteria.Proteobacteria.Alphaproteobacteria.Kiloniellales	4.12631	Cluster II	3.89186	0.0178507
	Bacteria.Proteobacteria.Alphaproteobacteria.Kiloniellales.unknown Kiloniellales	4.12433	Cluster II	3.90218	0.00652948
	Bacteria.Proteobacteria.Alphaproteobacteria.Rhodobacterales	5.16847			-
	Bacteria.Proteobacteria.Alphaproteobacteria.Rhodobacterales.Rhodobacteraceae	5.16847			-
	Bacteria.Proteobacteria.Alphaproteobacteria.Rhodobacterales.Rhodobacteraceae.unknown Rhodobacteraceae	5.16838			-
	Bacteria.Proteobacteria.Alphaproteobacteria.Rhodospirillales	4.06083	Cluster III	3.64418	0.0192272
	Bacteria.Proteobacteria.Alphaproteobacteria.Rhodospirillales.Rhodospirillaceae	4.06083	Cluster III	3.64411	0.0192272
	Bacteria.Proteobacteria.Alphaproteobacteria.Rhodospirillales.Rhodospirillaceae.unknown Rhodospirillaceae	4.04712	Cluster III	3.66924	0.0147618
	Bacteria.Proteobacteria.Alphaproteobacteria.Rickettsiales	5.29583	Cluster I	4.6644	0.025843
	Bacteria.Proteobacteria.Alphaproteobacteria.Rickettsiales.mitochondria	4.08719			-
	Bacteria.Proteobacteria.Alphaproteobacteria.Rickettsiales.mitochondria.Chattonella	4.08719			-
	Bacteria.Proteobacteria.Alphaproteobacteria.Rickettsiales.Pelagibacteraceae	5.27127			-
	Bacteria.Proteobacteria.Alphaproteobacteria.unknown Alphaproteobacteria	4.51287			-
	Bacteria.Proteobacteria.Betaproteobacteria	4.46272	Cluster II	3.98347	0.0051953
	Bacteria.Proteobacteria.Betaproteobacteria.Methylophilales	4.34479	Cluster II	3.89348	0.017053
	Bacteria.Proteobacteria.Betaproteobacteria.Methylophilales.Methylophilaceae	4.34479	Cluster II	3.87888	0.017053
	Bacteria.Proteobacteria.Deltaproteobacteria	4.62494	Cluster III	4.23629	0.00487879
	Bacteria.Proteobacteria.Deltaproteobacteria.Desulfobacterales	4.3131	Cluster III	4.00915	0.00633844
	Bacteria.Proteobacteria.Deltaproteobacteria.Desulfobacterales.Nitrospinaceae	4.3027	Cluster III	3.99857	0.00633844
	Bacteria.Proteobacteria.Deltaproteobacteria.Desulfobacterales.Nitrospinaceae.Nitrospina	4.3027	Cluster III	3.99829	0.00633844
	Bacteria.Proteobacteria.Deltaproteobacteria.Sva0853	3.90038	Cluster III	3.47097	0.0147618
	Bacteria.Proteobacteria.Deltaproteobacteria.Sva0853.SAR324	3.35219	Cluster III	3.94818	0.0109041
	Bacteria.Proteobacteria.Gammaproteobacteria	5.37923			-
	Bacteria.Proteobacteria.Gammaproteobacteria.Alteromonadales	4.84886			-
	Bacteria.Proteobacteria.Gammaproteobacteria.Alteromonadales.Alteromonadaceae	4.5267			-
	Bacteria.Proteobacteria.Gammaproteobacteria.Alteromonadales.Alteromonadaceae.Alteromonas	4.44219			-
	Bacteria.Proteobacteria.Gammaproteobacteria.Alteromonadales.Alteromonadaceae.HTCC2207	3.82573	Cluster III	3.77415	0.029515
	Bacteria.Proteobacteria.Gammaproteobacteria.Alteromonadales.Alteromonadaceae.Marinobacter	3.76244			-
	Bacteria.Proteobacteria.Gammaproteobacteria.Alteromonadales.Idiomarinaceae	3.54438			-
	Bacteria.Proteobacteria.Gammaproteobacteria.Alteromonadales.OM60	4.48203			-
	Bacteria.Proteobacteria.Gammaproteobacteria.HTCC2188	3.89954	Cluster I	3.73528	0.0267444
	Bacteria.Proteobacteria.Gammaproteobacteria.Oceanospirillales	5.05945	Cluster II	4.45344	0.0163844
	Bacteria.Proteobacteria.Gammaproteobacteria.Oceanospirillales.Halomonadaceae	4.9056	Cluster II	4.25748	0.0317456
	Bacteria.Proteobacteria.Gammaproteobacteria.Oceanospirillales.Halomonadaceae.CandidatusPortiera	4.88452	Cluster II	4.29672	0.0152113
	Bacteria.Proteobacteria.Gammaproteobacteria.Oceanospirillales.Halomonadaceae.Halomonas	3.5708			-
	Bacteria.Proteobacteria.Gammaproteobacteria.Oceanospirillales.Oceanospirillaceae	3.61262			-
	Bacteria.Proteobacteria.Gammaproteobacteria.Oceanospirillales.Oceanospirillaceae.unknown Oceanospirillaceae	3.54176	Cluster III	3.983	0.0109041
	Bacteria.Proteobacteria.Gammaproteobacteria.Oceanospirillales.unknown Oceanospirillales	4.56354	Cluster III	4.07356	0.0338535
	Bacteria.Proteobacteria.Gammaproteobacteria.Pseudomonadales	3.92288	Cluster II	3.56334	0.0417643
	Bacteria.Proteobacteria.Gammaproteobacteria.Pseudomonadales.Pseudomonadaceae	3.75092	Cluster II	3.54093	0.0336125
	Bacteria.Proteobacteria.Gammaproteobacteria.Pseudomonadales.Pseudomonadaceae.Pseudomonas	3.75092	Cluster II	3.53676	0.0336125
	Bacteria.Proteobacteria.Gammaproteobacteria.Thiohalorhabdales	3.89401	Cluster III	3.75813	0.0110457
	Bacteria.Proteobacteria.Gammaproteobacteria.Vibrionales	4.6991			-
	Bacteria.Proteobacteria.Gammaproteobacteria.Vibrionales.Pseudoalteromonadaceae	4.69372			-
	Bacteria.Proteobacteria.Gammaproteobacteria.Vibrionales.Pseudoalteromonadaceae.Pseudoalteromonas	4.43881			-
	Bacteria.Proteobacteria.Gammaproteobacteria.Vibrionales.Pseudoalteromonadaceae.unknown Pseudoalteromonadaceae	4.34108			-
	Bacteria.Rhodothermaeota	4.70811	Cluster I	4.3289	0.00805527
	Bacteria.Rhodothermaeota.Balneolia	4.66858	Cluster I	4.29226	0.00904345
	Bacteria.Rhodothermaeota.Balneolia.Balneolales	4.66858	Cluster I	4.28881	0.00904345
	Bacteria.Rhodothermaeota.Balneolia.Balneolales.Balneolaceae	4.66858	Cluster I	4.28972	0.00904345
	Bacteria.Rhodothermaeota.Balneolia.Balneolales.Balneolaceae.Balneola	4.63657	Cluster I	4.26007	0.0203288
	Bacteria.Rhodothermaeota.Balneolia.Balneolales.Balneolaceae.KSA1	3.52014			-
	Bacteria.Rhodothermaeota.Rhodothermia	3.64772			-
	Bacteria.Rhodothermaeota.Rhodothermia.Rhodothermales	3.64772			-
	Bacteria.Rhodothermaeota.Rhodothermia.Rhodothermales.Rhodothermaceae	3.64772			-
	Bacteria.SAR406	4.31464	Cluster III	3.96521	0.0191998
	Bacteria.Tenericutes	4.14298	Cluster II	3.90188	0.00737865
	Bacteria.Tenericutes.Mollicutes	4.14298	Cluster II	3.88427	0.00737865
	Bacteria.Tenericutes.Mollicutes.Acholeplasmatales	4.14298	Cluster II	3.88704	0.00737865
	Bacteria.Tenericutes.Mollicutes.Acholeplasmatales.Acholeplasmataceae	4.14298	Cluster II	3.9047	0.00737865
	Bacteria.Tenericutes.Mollicutes.Acholeplasmatales.Acholeplasmataceae.Acholeplasma	4.14298	Cluster II	3.89447	0.00737865
	Bacteria.Verrucomicrobia	4.32712			-
	Bacteria.Verrucomicrobia.Opitutae	4.18102			-
	Bacteria.Verrucomicrobia.Opitutae.Puniceicoccales	4.12763			-
	Bacteria.Verrucomicrobia.Opitutae.Puniceicoccales.Puniceicoccaceae	4.12763			-
	Bacteria.Verrucomicrobia.Opitutae.Puniceicoccales.Puniceicoccaceae.MB11C04	4.05813			-
	Bacteria.Verrucomicrobia.Pedosphaerae	3.72091	Cluster II	3.65647	0.0107826
	Bacteria.Verrucomicrobia.Pedosphaerae.unknown Pedosphaerae	3.59124	Cluster II	3.60971	0.0135791
