# Supplementary material for: Distribution of bacterial communities along the spatial and environmental gradients from Bohai Sea to northern Yellow Sea
Source: PeerJ. 2018 Jan 29;6:e4272. doi: 10.7717/peerj.4272 (PMC5793709; doi:10.7717/peerj.4272)
Supplement: Dataset S3 — Significant correlations (P ≤ 0.05 after Benjamini-Hochberg multiple test correction) are highlighted with gray shadow. [file peerj-06-4272-s004.xlsx]

## Sheet: Sheet1
	Dataset S3 Spearman's correlations between the significant taxa from Fig. 3 and environmental factors are shown in this table. Significant correlations (P ≤ 0.05 after Benjamini-Hochberg multiple test correction) are highlighted with gray shadow.
	Taxonomic Level	Class	Feature	Longitude	Latitude	Water Depth	Collection Depth	Temperature	Salinity	pH	Turbidity	DO	Chl a	NH4-N	NO2-N	NO3-N	PO4-P	SiO3-Si
	phylum	Cluster I	Bacteria.Cyanobacteria	0.35	0.33	0.3	-0.55	0.38	0.1	0.54	-0.65	0.5	0.13	-0.28	-0.56	-0.49	-0.3	-0.5
	class	Cluster I	Bacteria.Cyanobacteria.Synechococcophycideae	0.35	0.33	0.3	-0.55	0.38	0.1	0.54	-0.65	0.5	0.13	-0.28	-0.56	-0.49	-0.3	-0.5
	order	Cluster I	Bacteria.Cyanobacteria.Synechococcophycideae.Synechococcales	0.35	0.33	0.3	-0.55	0.38	0.1	0.54	-0.65	0.5	0.13	-0.28	-0.56	-0.49	-0.3	-0.5
	family	Cluster I	Bacteria.Cyanobacteria.Synechococcophycideae.Synechococcales.Synechococcaceae	0.35	0.33	0.3	-0.55	0.38	0.1	0.54	-0.65	0.5	0.13	-0.28	-0.56	-0.49	-0.3	-0.5
	genus	Cluster I	Bacteria.Cyanobacteria.Synechococcophycideae.Synechococcales.Synechococcaceae.Synechococcus	0.35	0.33	0.3	-0.55	0.38	0.1	0.54	-0.65	0.5	0.13	-0.28	-0.56	-0.49	-0.3	-0.5
	order	Cluster I	Bacteria.Proteobacteria.Alphaproteobacteria.Rickettsiales	0.68	0.21	0.84	0.17	-0.02	0.68	0.11	-0.49	-0.01	-0.55	0.17	-0.56	-0.34	0.42	0
	phylum	Cluster I	Bacteria.Rhodothermaeota	0.41	0.09	0.32	-0.47	0.42	0.16	0.75	-0.61	0.43	0.05	-0.19	-0.28	-0.73	-0.24	-0.58
	class	Cluster I	Bacteria.Rhodothermaeota.Balneolia	0.35	0.12	0.24	-0.53	0.38	0.08	0.73	-0.61	0.5	0.19	-0.31	-0.32	-0.76	-0.33	-0.6
	order	Cluster I	Bacteria.Rhodothermaeota.Balneolia.Balneolales	0.35	0.12	0.24	-0.53	0.38	0.08	0.73	-0.61	0.5	0.19	-0.31	-0.32	-0.76	-0.33	-0.6
	family	Cluster I	Bacteria.Rhodothermaeota.Balneolia.Balneolales.Balneolaceae	0.35	0.12	0.24	-0.53	0.38	0.08	0.73	-0.61	0.5	0.19	-0.31	-0.32	-0.76	-0.33	-0.6
	genus	Cluster I	Bacteria.Rhodothermaeota.Balneolia.Balneolales.Balneolaceae.Balneola	0.39	0.06	0.22	-0.43	0.26	0.21	0.68	-0.57	0.45	0.18	-0.31	-0.18	-0.71	-0.18	-0.54
	phylum	Cluster II	Bacteria.Bacteroidetes	-0.51	-0.21	-0.51	-0.05	0.08	-0.51	-0.26	0.33	-0.03	0.28	0.24	0.21	0.37	-0.23	0.12
	class	Cluster II	Bacteria.Bacteroidetes.Flavobacteriia	-0.69	-0.09	-0.68	-0.07	0.08	-0.66	-0.29	0.49	-0.14	0.34	0.14	0.37	0.34	-0.26	0.17
	order	Cluster II	Bacteria.Bacteroidetes.Flavobacteriia.Flavobacteriales	-0.64	-0.08	-0.62	-0.11	0.12	-0.58	-0.2	0.38	-0.04	0.39	0.23	0.36	0.28	-0.25	0.1
	family	Cluster II	Bacteria.Bacteroidetes.Flavobacteriia.Flavobacteriales.Cryomorphaceae	-0.86	0.06	-0.93	-0.12	0.03	-0.75	-0.27	0.7	-0.2	0.51	-0.2	0.56	0.27	-0.27	0.25
	genus	Cluster II	Bacteria.Bacteroidetes.Flavobacteriia.Flavobacteriales.Cryomorphaceae.Fluviicola	-0.8	-0.03	-0.9	-0.01	-0.08	-0.62	-0.36	0.74	-0.28	0.45	-0.17	0.64	0.38	-0.1	0.31
	genus	Cluster II	Bacteria.Bacteroidetes.Flavobacteriia.Flavobacteriales.Cryomorphaceae.unknown Cryomorphaceae	-0.81	-0.03	-0.86	-0.42	0.35	-0.88	0.05	0.44	0.14	0.63	-0.16	0.16	0.13	-0.6	-0.06
	family	Cluster II	Bacteria.Proteobacteria.Alphaproteobacteria.Kiloniellales.unknown Kiloniellales	-0.79	-0.13	-0.82	-0.59	0.56	-0.95	0.23	0.36	0.3	0.77	-0.14	0.13	-0.11	-0.68	-0.27
	class	Cluster II	Bacteria.Proteobacteria.Betaproteobacteria	-0.71	-0.05	-0.66	0.24	-0.16	-0.47	-0.56	0.77	-0.51	0.05	0.22	0.65	0.63	0.09	0.45
	order	Cluster II	Bacteria.Proteobacteria.Gammaproteobacteria.Oceanospirillales	-0.38	-0.11	-0.33	0.63	-0.45	-0.07	-0.59	0.69	-0.63	-0.15	0.22	0.44	0.65	0.42	0.71
	family	Cluster II	Bacteria.Proteobacteria.Gammaproteobacteria.Oceanospirillales.Halomonadaceae	-0.5	-0.11	-0.39	0.51	-0.32	-0.25	-0.45	0.71	-0.63	-0.2	0.29	0.58	0.56	0.17	0.54
	genus	Cluster II	Bacteria.Proteobacteria.Gammaproteobacteria.Oceanospirillales.Halomonadaceae.CandidatusPortiera	-0.48	-0.14	-0.44	0.55	-0.41	-0.18	-0.45	0.73	-0.66	-0.17	0.25	0.66	0.62	0.25	0.57
	phylum	Cluster II	Bacteria.Tenericutes	-0.9	0.03	-0.9	-0.23	0.25	-0.79	-0.21	0.69	-0.18	0.48	-0.04	0.31	0.23	-0.19	0.22
	family	Cluster II	Bacteria.Tenericutes.Mollicutes.Acholeplasmatales.Acholeplasmataceae	-0.9	0.03	-0.9	-0.23	0.25	-0.79	-0.21	0.69	-0.18	0.48	-0.04	0.31	0.23	-0.19	0.22
	order	Cluster III	Bacteria.Firmicutes.Bacilli.Bacillales	0.06	-0.01	0.01	0.82	-0.7	0.29	-0.63	0.49	-0.85	-0.61	-0.04	0.6	0.64	0.59	0.73
	family	Cluster III	Bacteria.Firmicutes.Bacilli.Bacillales.Bacillaceae	0.06	-0.01	0.01	0.82	-0.7	0.29	-0.63	0.49	-0.85	-0.61	-0.04	0.6	0.64	0.59	0.73
	phylum	Cluster III	Bacteria.Planctomycetes	-0.12	0.02	-0.08	0.86	-0.79	0.2	-0.78	0.6	-0.79	-0.46	0.09	0.66	0.77	0.51	0.76
	class	Cluster III	Bacteria.Planctomycetes.Planctomycetia	-0.09	0.03	-0.06	0.89	-0.84	0.22	-0.75	0.6	-0.8	-0.45	0.02	0.65	0.7	0.53	0.78
	order	Cluster III	Bacteria.Planctomycetes.Planctomycetia.Planctomycetales	-0.07	0.08	-0.04	0.9	-0.88	0.24	-0.82	0.61	-0.81	-0.44	-0.08	0.63	0.64	0.56	0.82
	family	Cluster III	Bacteria.Planctomycetes.Planctomycetia.Planctomycetales.Planctomycetaceae	-0.07	0.08	-0.04	0.9	-0.88	0.24	-0.82	0.61	-0.81	-0.44	-0.08	0.63	0.64	0.56	0.82
	genus	Cluster III	Bacteria.Planctomycetes.Planctomycetia.Planctomycetales.Planctomycetaceae.Planctomyces	-0.07	0.08	-0.04	0.9	-0.88	0.24	-0.82	0.61	-0.81	-0.44	-0.08	0.63	0.64	0.56	0.82
	class	Cluster III	Bacteria.Proteobacteria.Deltaproteobacteria	0	0.09	0.09	0.9	-0.73	0.32	-0.89	0.61	-0.86	-0.58	0.04	0.44	0.66	0.71	0.89
	order	Cluster III	Bacteria.Proteobacteria.Deltaproteobacteria.Desulfobacterales	0	0.23	0	0.87	-0.92	0.33	-0.88	0.57	-0.75	-0.35	-0.27	0.39	0.63	0.66	0.89
	family	Cluster III	Bacteria.Proteobacteria.Deltaproteobacteria.Desulfobacterales.Nitrospinaceae	0	0.24	0.01	0.87	-0.92	0.33	-0.86	0.55	-0.76	-0.36	-0.25	0.39	0.63	0.67	0.88
	genus	Cluster III	Bacteria.Proteobacteria.Deltaproteobacteria.Desulfobacterales.Nitrospinaceae.Nitrospina	0	0.24	0.01	0.87	-0.92	0.33	-0.86	0.55	-0.76	-0.36	-0.25	0.39	0.63	0.67	0.88
	family	Cluster III	Bacteria.Proteobacteria.Deltaproteobacteria.Sva0853.SAR324	0.49	-0.1	0.52	0.85	-0.8	0.69	-0.55	0.03	-0.46	-0.6	0.18	0.23	0.53	0.62	0.5
	genus	Cluster III	Bacteria.Proteobacteria.Gammaproteobacteria.Oceanospirillales.Oceanospirillaceae.unknown Oceanospirillaceae	0.49	-0.1	0.52	0.85	-0.8	0.69	-0.55	0.03	-0.46	-0.6	0.18	0.23	0.53	0.62	0.5
	family	Cluster III	Bacteria.Proteobacteria.Gammaproteobacteria.Oceanospirillales.unknown Oceanospirillales	-0.34	0	-0.3	0.58	-0.46	0.05	-0.63	0.66	-0.64	-0.16	0.17	0.33	0.64	0.6	0.75
	phylum	Cluster III	Bacteria.SAR406	0.33	-0.08	0.3	0.83	-0.71	0.61	-0.57	0.26	-0.75	-0.82	0.18	0.48	0.55	0.71	0.6
